# Supplementary material for: Exploring the Influence of Origin, Harvest Time, and Cultivation Method on Antioxidant Capacity and Bioactive Compounds of Matcha Teas
Source: MDPI journal article supplement (doi:10.3390/foods13081270), 2024-04-21
Supplement: s1 [file s1]

**Table S1.** Characteristics of examined material. available on the Polish food market.

| Material | Cultivation       | Time of harvest | Country of origin | Supplier          |
|----------|-------------------|-----------------|-------------------|-------------------|
| M1       | organically grown | summer          | Japan             | Moya Matcha       |
| M2       | organically grown | summer          | Japan             | Moya Matcha       |
| M3       | organically grown | spring          | Japan             | Moya Matcha       |
| M4       | organically grown | spring          | China             | Oxalis            |
| M5       | organically grown | spring          | South Korea       | Oxalis            |
| M6       | organically grown | spring          | Japan             | Oxalis            |
| M7       | organically grown | unknown         | South Korea       | Brown House & Tea |
| M8       | conventional      | spring          | Japan             | Ju Matcha         |
| M9       | conventional      | unknown         | China             | Czas na herbatę   |
| M10      | organically grown | unknown         | China             | Superfoods        |
| M11      | organically grown | spring          | South Korea       | Nokchawon         |

**Table S2.** Spearman's rank correlation between parameters for Matcha tea.

|                       |                         | 4-hydroxybenzoic acid | apigenin | caffeic acid | caffeine | chlorogenic acid | ellagic acid | epicatechin gallate | ferulic acid | flavonoids | FRAP         | gallic acid  | kaempferol | myricetin | p-coumaric acid | polyphenols | quercetin   | resveratrol  | rutin  | sinapic acid | TEAC   | vitamin C |
|-----------------------|-------------------------|-----------------------|----------|--------------|----------|------------------|--------------|---------------------|--------------|------------|--------------|--------------|------------|-----------|-----------------|-------------|-------------|--------------|--------|--------------|--------|-----------|
| 4-hydroxybenzoic acid | Correlation coefficient | 1                     | -        | -            | -        | -                | -            | -                   | -            | -          | -            | -            | -          | -         | -               | -           | -           | -            | -      | -            | -      | -         |
|                       | Significance Level P    | -                     | -        | -            | -        | -                | -            | -                   | -            | -          | -            | -            | -          | -         | -               | -           | -           | -            | -      | -            | -      | -         |
| apigenin              | Correlation coefficient | 0.408                 | 1        | -            | -        | -                | -            | -                   | -            | -          | -            | -            | -          | -         | -               | -           | -           | -            | -      | -            | -      | -         |
|                       | Significance Level P    | 0.0251                | -        | -            | -        | -                | -            | -                   | -            | -          | -            | -            | -          | -         | -               | -           | -           | -            | -      | -            | -      | -         |
| caffeic acid          | Correlation coefficient | 0.64                  | 0.179    | 1            | -        | -                | -            | -                   | -            | -          | -            | -            | -          | -         | -               | -           | -           | -            | -      | -            | -      | -         |
|                       | Significance Level P    | 0.0001                | 0.3437   | -            | -        | -                | -            | -                   | -            | -          | -            | -            | -          | -         | -               | -           | -           | -            | -      | -            | -      | -         |
| caffeine              | Correlation coefficient | 0.642                 | 0.481    | -0.001       | 1        | -                | -            | -                   | -            | -          | -            | -            | -          | -         | -               | -           | -           | -            | -      | -            | -      | -         |
|                       | Significance Level P    | 0.0001                | 0.0071   | 0.9953       | -        | -                | -            | -                   | -            | -          | -            | -            | -          | -         | -               | -           | -           | -            | -      | -            | -      | -         |
| chlorogenic acid      | Correlation coefficient | <b>0.847</b>          | 0.592    | 0.651        | 0.56     | 1                | -            | -                   | -            | -          | -            | -            | -          | -         | -               | -           | -           | -            | -      | -            | -      | -         |
|                       | Significance Level P    | <0.0001               | 0.0006   | 0.0001       | 0.0013   | -                | -            | -                   | -            | -          | -            | -            | -          | -         | -               | -           | -           | -            | -      | -            | -      | -         |
| ellagic acid          | Correlation coefficient | 0.162                 | 0.545    | 0.235        | 0.382    | 0.255            | 1            | -                   | -            | -          | -            | -            | -          | -         | -               | -           | -           | -            | -      | -            | -      | -         |
|                       | Significance Level P    | 0.3919                | 0.0019   | 0.211        | 0.037    | 0.1743           | -            | -                   | -            | -          | -            | -            | -          | -         | -               | -           | -           | -            | -      | -            | -      | -         |
| epicatechin gallate   | Correlation coefficient | 0.063                 | 0.103    | -0.2         | 0.225    | -0.009           | -0.197       | 1                   | -            | -          | -            | -            | -          | -         | -               | -           | -           | -            | -      | -            | -      | -         |
|                       | Significance Level P    | 0.741                 | 0.5897   | 0.2882       | 0.2312   | 0.9618           | 0.297        | -                   | -            | -          | -            | -            | -          | -         | -               | -           | -           | -            | -      | -            | -      | -         |
| ferulic acid          | Correlation coefficient | -0.273                | 0.277    | -0.233       | -0.111   | -0.047           | 0.254        | -0.346              | 1            | -          | -            | -            | -          | -         | -               | -           | -           | -            | -      | -            | -      | -         |
|                       | Significance Level P    | 0.1451                | 0.1377   | 0.2146       | 0.5592   | 0.8054           | 0.1759       | 0.0608              | -            | -          | -            | -            | -          | -         | -               | -           | -           | -            | -      | -            | -      | -         |
| flavonoids            | Correlation coefficient | 0.106                 | -0.229   | -0.341       | 0.561    | -0.112           | -0.007       | 0.034               | -0.471       | 1          | -            | -            | -          | -         | -               | -           | -           | -            | -      | -            | -      | -         |
|                       | Significance Level P    | 0.5784                | 0.2237   | 0.0651       | 0.0013   | 0.5545           | 0.9693       | 0.8601              | 0.0087       | -          | -            | -            | -          | -         | -               | -           | -           | -            | -      | -            | -      | -         |
| FRAP                  | Correlation coefficient | -0.549                | 0.028    | -0.228       | -0.18    | -0.425           | 0.533        | -0.231              | 0.18         | 0.295      | 1            | -            | -          | -         | -               | -           | -           | -            | -      | -            | -      | -         |
|                       | Significance Level P    | 0.0017                | 0.884    | 0.2265       | 0.3413   | 0.0193           | 0.0024       | 0.2191              | 0.3425       | 0.003      | -            | -            | -          | -         | -               | -           | -           | -            | -      | -            | -      | -         |
| gallic acid           | Correlation coefficient | -0.124                | -0.067   | 0.081        | -0.106   | -0.037           | 0.415        | -0.749              | 0.648        | -0.102     | 0.29         | 1            | -          | -         | -               | -           | -           | -            | -      | -            | -      | -         |
|                       | Significance Level P    | 0.5141                | 0.7252   | 0.6697       | 0.5768   | 0.8473           | 0.0225       | <0.0001             | 0.0001       | 0.5929     | 0.1196       | -            | -          | -         | -               | -           | -           | -            | -      | -            | -      | -         |
| kaempferol            | Correlation coefficient | 0.371                 | 0.633    | -0.024       | 0.447    | 0.574            | 0.212        | 0.22                | 0.174        | -0.031     | -0.032       | -0.097       | 1          | -         | -               | -           | -           | -            | -      | -            | -      | -         |
|                       | Significance Level P    | 0.0434                | 0.0002   | 0.9006       | 0.0133   | 0.0009           | 0.2617       | 0.2427              | 0.3585       | 0.8693     | 0.8656       | 0.6093       | -          | -         | -               | -           | -           | -            | -      | -            | -      | -         |
| myricetin             | Correlation coefficient | 0.152                 | 0.308    | 0.058        | 0.269    | 0.347            | 0.211        | 0.551               | 0.363        | -0.357     | -0.119       | -0.054       | 0.462      | 1         | -               | -           | -           | -            | -      | -            | -      | -         |
|                       | Significance Level P    | 0.4242                | 0.0981   | 0.7623       | 0.15     | 0.0601           | 0.2638       | 0.0016              | 0.0485       | 0.0531     | 0.5295       | 0.7766       | 0.0102     | -         | -               | -           | -           | -            | -      | -            | -      | -         |
| p-coumaric acid       | Correlation coefficient | -0.269                | 0.108    | -0.05        | -0.075   | -0.09            | 0.461        | -0.578              | <b>0.781</b> | -0.209     | 0.326        | <b>0.897</b> | -0.131     | 0.116     | 1               | -           | -           | -            | -      | -            | -      | -         |
|                       | Significance Level P    | 0.1507                | 0.571    | 0.7923       | 0.6941   | 0.6376           | 0.0104       | 0.0008              | <0.0001      | 0.2666     | 0.0783       | <0.000       | 0.4886     | 0.5423    | -               | -           | -           | -            | -      | -            | -      | -         |
| polyphenols           | Correlation coefficient | -0.535                | 0.198    | -0.201       | -0.18    | -0.288           | 0.541        | -0.3                | 0.394        | 0.299      | <b>0.869</b> | 0.374        | 0.09       | -0.009    | 0.476           | 1           | -           | -            | -      | -            | -      | -         |
|                       | Significance Level P    | 0.0023                | 0.294    | 0.288        | 0.3404   | 0.1227           | 0.002        | 0.1075              | 0.0312       | 0.0026     | <0.0001      | 0.0415       | 0.6374     | 0.9637    | 0.0079          | -           | -           | -            | -      | -            | -      | -         |
| quercetin             | Correlation coefficient | -0.257                | 0.102    | -0.129       | -0.045   | -0.047           | 0.465        | -0.59               | <b>0.763</b> | -0.113     | 0.418        | <b>0.924</b> | 0.153      | 0.133     | <b>0.91</b>     | 0.551       | 1           | -            | -      | -            | -      | -         |
|                       | Significance Level P    | 0.171                 | 0.5911   | 0.4958       | 0.8144   | 0.8072           | 0.0097       | 0.0006              | <0.0001      | 0.5511     | 0.0215       | <0.000       | 0.4185     | 0.4839    | <0.0001         | 0.0016      | -           | -            | -      | -            | -      | -         |
| resveratrol           | Correlation coefficient | <b>0.752</b>          | 0.584    | 0.628        | 0.498    | <b>0.707</b>     | 0.523        | 0.254               | -0.095       | -0.234     | -0.234       | -0.175       | 0.354      | 0.454     | -0.186          | -0.228      | -0.229      | 1            | -      | -            | -      | -         |
|                       | Significance Level P    | <0.0001               | 0.0007   | 0.0002       | 0.0051   | <0.0001          | 0.0031       | 0.1751              | 0.6175       | 0.2128     | 0.2137       | 0.356        | 0.0553     | 0.0117    | 0.3246          | 0.2262      | 0.2244      | -            | -      | -            | -      | -         |
| rutin                 | Correlation coefficient | -0.475                | 0.156    | -0.205       | -0.202   | -0.19            | 0.493        | -0.352              | <b>0.728</b> | -0.271     | 0.554        | <b>0.747</b> | 0.146      | 0.263     | <b>0.85</b>     | 0.686       | <b>0.91</b> | -0.247       | 1      | -            | -      | -         |
|                       | Significance Level P    | 0.008                 | 0.4112   | 0.2767       | 0.2836   | 0.3134           | 0.0056       | 0.0567              | <0.0001      | 0.1477     | 0.0015       | <0.000       | 0.4407     | 0.1607    | <0.0001         | <0.0001     | <0.0001     | 0.189        | -      | -            | -      | -         |
| sinapic acid          | Correlation coefficient | 0.341                 | 0.585    | 0.485        | 0.353    | 0.442            | <b>0.943</b> | -0.087              | 0.114        | -0.151     | 0.361        | 0.285        | 0.262      | 0.308     | 0.316           | 0.376       | 0.305       | <b>0.703</b> | 0.362  | 1            | -      | -         |
|                       | Significance Level P    | 0.0651                | 0.0007   | 0.0066       | 0.056    | 0.0146           | <0.0001      | 0.6493              | 0.5497       | 0.4256     | 0.05         | 0.1263       | 0.1622     | 0.0976    | 0.0889          | 0.0404      | 0.1016      | <0.0001      | 0.0496 | -            | -      | -         |
| TEAC                  | Correlation coefficient | -0.078                | 0.101    | -0.064       | 0.082    | 0.044            | 0.501        | -0.468              | 0.16         | 0.259      | 0.61         | 0.463        | 0.436      | -0.146    | 0.237           | 0.566       | 0.552       | -0.051       | 0.461  | 0.378        | 1      | -         |
|                       | Significance Level P    | 0.6817                | 0.597    | 0.7383       | 0.6671   | 0.8154           | 0.0048       | 0.0091              | 0.3978       | 0.0096     | <0.0001      | 0.0099       | 0.016      | 0.4429    | 0.2067          | <0.0001     | 0.0015      | 0.7901       | 0.0104 | 0.0396       | -      | -         |
| vitamin C             | Correlation coefficient | 0.077                 | -0.063   | -0.33        | 0.56     | -0.057           | -0.143       | 0.529               | -0.21        | 0.24       | -0.036       | -0.354       | -0.178     | 0.243     | -0.133          | 0.058       | -0.306      | -0.025       | -0.299 | -0.201       | -0.535 | 1         |
|                       | Significance Level P    | 0.6877                | 0.7401   | 0.0752       | 0.0013   | 0.765            | 0.4514       | 0.0026              | 0.2663       | 0.0169     | 0.724        | 0.0548       | 0.3479     | 0.1953    | 0.483           | 0.571       | 0.1002      | 0.8969       | 0.1089 | 0.2865       | <0.000 | -         |

**Table S3.** Summary of the content of polyphenolic acids, flavonoids and caffeine in Matcha tea samples. Data represent the minimum, 25th percentile, median, 75th percentile and maximum values.

| Compound              | Minimum<br>[mg/L] | 25th<br>percentile<br>[mg/L] | Median [mg/L] | 75th<br>percentile<br>[mg/L] | Maximum<br>[mg/L] | IQR    |
|-----------------------|-------------------|------------------------------|---------------|------------------------------|-------------------|--------|
| 4-hydroxybenzoic acid | 16.10             | 40.22                        | 50.02         | 54.85                        | 95.56             | 14.63  |
| caffeic acid          | 1.65              | 2.60                         | 3.51          | 9.94                         | 185.94            | 7.34   |
| chlorogenic acid      | 15.61             | 26.69                        | 32.54         | 43.81                        | 164.08            | 17.12  |
| ellagic acid          | 0.85              | 5.25                         | 9.17          | 12.55                        | 59.58             | 7.30   |
| trans-p-coumaric acid | 0.00              | 0.00                         | 0.20          | 3.52                         | 7.82              | 3.52   |
| ferulic acid          | 6.60              | 8.47                         | 13.83         | 22.46                        | 29.63             | 13.99  |
| gallic acid           | 13.85             | 37.99                        | 153.01        | 304.02                       | 1119.42           | 266.03 |
| sinapic acid          | 8.09              | 26.09                        | 30.80         | 49.91                        | 104.03            | 23.82  |
| apigenin              | 3.93              | 5.57                         | 8.72          | 9.94                         | 13.97             | 4.37   |
| epicatechin gallate   | 2.68              | 8.66                         | 165.79        | 196.84                       | 234.03            | 188.18 |
| kaempferol            | 0.54              | 1.10                         | 1.52          | 3.00                         | 7.68              | 1.9    |
| myricetin             | 1.11              | 5.58                         | 105.23        | 131.05                       | 153.33            | 125.47 |
| quercetin             | 0                 | 0.47                         | 2.98          | 5.69                         | 20.50             | 5.22   |
| resveratrol           | 3.33              | 14.63                        | 16.71         | 25.32                        | 36.57             | 10.69  |
| rutin                 | 0.00              | 0.00                         | 14.12         | 38.06                        | 117.51            | 38.06  |
| caffeine              | 826.23            | 1522.57                      | 1853.20       | 2182.88                      | 7313.22           | 660.31 |
